# Supplementary material
Source: publisher figshare collection journal article supplement (https://acs.figshare.com/ndownloader/files/4131226)
Supplement: Supplementary file 1 [file 4131226]

 
data_wyy 
 
_audit_creation_method            SHELXL-97 
_chemical_name_systematic 
; 
 ? 
; 
_chemical_name_common             ? 
_chemical_melting_point           ? 
_chemical_formula_moiety          ? 
_chemical_formula_sum 
 'C28 H25 Mg O2.50' 
_chemical_formula_weight          425.79 
 
loop_ 
 _atom_type_symbol 
 _atom_type_description 
 _atom_type_scat_dispersion_real 
 _atom_type_scat_dispersion_imag 
 _atom_type_scat_source 
 'C'  'C'   0.0033   0.0016 
 'International Tables Vol C Tables 4.2.6.8 and 6.1.1.4' 
 'H'  'H'   0.0000   0.0000 
 'International Tables Vol C Tables 4.2.6.8 and 6.1.1.4' 
 'O'  'O'   0.0106   0.0060 
 'International Tables Vol C Tables 4.2.6.8 and 6.1.1.4' 
 'Mg'  'Mg'   0.0486   0.0363 
 'International Tables Vol C Tables 4.2.6.8 and 6.1.1.4' 
 
_symmetry_cell_setting            monoclinic 
_symmetry_space_group_name_H-M    P2(1)/C 
 
loop_ 
 _symmetry_equiv_pos_as_xyz 
 'x, y, z' 
 '-x, y+1/2, -z+1/2' 
 '-x, -y, -z' 
 'x, -y-1/2, z-1/2' 
 
_cell_length_a                    12.8509(9) 
_cell_length_b                    14.1392(10) 
_cell_length_c                    28.232(2) 
_cell_angle_alpha                 90.00 
_cell_angle_beta                  91.5750(10) 
_cell_angle_gamma                 90.00 
_cell_volume                      5127.8(6) 
_cell_formula_units_Z             8 
_cell_measurement_temperature     144.5(2) 
_cell_measurement_reflns_used     ? 
_cell_measurement_theta_min       ? 
_cell_measurement_theta_max       ? 
 
_exptl_crystal_description        block 
_exptl_crystal_colour             colorless 
_exptl_crystal_size_max           0.20 
_exptl_crystal_size_mid           0.17 
_exptl_crystal_size_min           0.15 
_exptl_crystal_density_meas       ? 
_exptl_crystal_density_diffrn     1.103 
_exptl_crystal_density_method     'not measured' 
_exptl_crystal_F_000              1800 
_exptl_absorpt_coefficient_mu     0.091 
_exptl_absorpt_correction_type    multi-scan 
_exptl_absorpt_correction_T_min   0.9820 
_exptl_absorpt_correction_T_max   0.9865 
_exptl_absorpt_process_details    ? 
 
_exptl_special_details 
; 
 ? 
; 
 
_diffrn_ambient_temperature       144.5(2) 
_diffrn_radiation_wavelength      0.71073 
_diffrn_radiation_type            MoK\a 
_diffrn_radiation_source          'fine-focus sealed tube' 
_diffrn_radiation_monochromator   graphite 
_diffrn_measurement_device_type   ? 
_diffrn_measurement_method        ? 
_diffrn_detector_area_resol_mean  ? 
_diffrn_standards_number          ? 
_diffrn_standards_interval_count  ? 
_diffrn_standards_interval_time   ? 
_diffrn_standards_decay_%         ? 
_diffrn_reflns_number             29853 
_diffrn_reflns_av_R_equivalents   0.0838 
_diffrn_reflns_av_sigmaI/netI     0.1001 
_diffrn_reflns_limit_h_min        -15 
_diffrn_reflns_limit_h_max        15 
_diffrn_reflns_limit_k_min        -16 
_diffrn_reflns_limit_k_max        14 
_diffrn_reflns_limit_l_min        -33 
_diffrn_reflns_limit_l_max        31 
_diffrn_reflns_theta_min          1.59 
_diffrn_reflns_theta_max          25.04 
_reflns_number_total              9055 
_reflns_number_gt                 3364 
_reflns_threshold_expression      >2sigma(I) 
 
_computing_data_collection        ? 
_computing_cell_refinement        ? 
_computing_data_reduction         ? 
_computing_structure_solution     'SHELXS-97 (Sheldrick, 1990)' 
_computing_structure_refinement   'SHELXL-97 (Sheldrick, 1997)' 
_computing_molecular_graphics     ? 
_computing_publication_material   ? 
 
_refine_special_details 
; 
 Refinement of F^2^ against ALL reflections.  The weighted R-factor wR and 
 goodness of fit S are based on F^2^, conventional R-factors R are based 
 on F, with F set to zero for negative F^2^. The threshold expression of 
 F^2^ > 2sigma(F^2^) is used only for calculating R-factors(gt) etc. and is 
 not relevant to the choice of reflections for refinement.  R-factors based 
 on F^2^ are statistically about twice as large as those based on F, and R- 
 factors based on ALL data will be even larger. 
; 
 
_refine_ls_structure_factor_coef  Fsqd  
_refine_ls_matrix_type            full 
_refine_ls_weighting_scheme       calc  
_refine_ls_weighting_details 
 'calc w=1/[\s^2^(Fo^2^)+(0.2000P)^2^+0.0000P] where P=(Fo^2^+2Fc^2^)/3' 
_atom_sites_solution_primary      direct 
_atom_sites_solution_secondary    difmap 
_atom_sites_solution_hydrogens    geom 
_refine_ls_hydrogen_treatment     constr 
_refine_ls_extinction_method      none 
_refine_ls_extinction_coef        ? 
_refine_ls_number_reflns          9055 
_refine_ls_number_parameters      568 
_refine_ls_number_restraints      6 
_refine_ls_R_factor_all           0.2629 
_refine_ls_R_factor_gt            0.1371 
_refine_ls_wR_factor_ref          0.4279 
_refine_ls_wR_factor_gt           0.3553 
_refine_ls_goodness_of_fit_ref    1.165 
_refine_ls_restrained_S_all       1.168 
_refine_ls_shift/su_max           0.002 
_refine_ls_shift/su_mean          0.000 
 
loop_ 
 _atom_site_label 
 _atom_site_type_symbol 
 _atom_site_fract_x 
 _atom_site_fract_y 
 _atom_site_fract_z 
 _atom_site_U_iso_or_equiv 
 _atom_site_adp_type 
 _atom_site_occupancy 
 _atom_site_symmetry_multiplicity 
 _atom_site_calc_flag 
 _atom_site_refinement_flags 
 _atom_site_disorder_assembly 
 _atom_site_disorder_group 
Mg1 Mg 0.5734(2) -0.00390(18) 0.04060(7) 0.0824(9) Uani 1 1 d . . . 
Mg2 Mg 0.6767(2) -0.0072(2) 0.13453(8) 0.0864(9) Uani 1 1 d . . . 
O1 O 0.6956(4) 0.0494(5) 0.07224(16) 0.0849(16) Uani 1 1 d . . . 
O2 O 0.5509(5) -0.0605(4) 0.10335(16) 0.0821(16) Uani 1 1 d . . . 
O3 O 0.4615(4) 0.0785(3) 0.01585(15) 0.0833(16) Uani 1 1 d . . . 
O4 O 0.7615(5) -0.0899(4) 0.16903(19) 0.114(2) Uani 1 1 d . . . 
O5 O 0.6442(4) 0.1030(4) 0.17725(16) 0.0880(17) Uani 1 1 d . . . 
C1 C 0.7492(7) 0.1336(8) 0.0606(3) 0.099(3) Uani 1 1 d . . . 
H1 H 0.6982 0.1851 0.0601 0.119 Uiso 1 1 calc R . . 
C2 C 0.4574(8) -0.1035(6) 0.1167(3) 0.087(3) Uani 1 1 d . . . 
H2 H 0.4088 -0.0989 0.0894 0.105 Uiso 1 1 calc R . . 
C3 C 0.4175(8) 0.1544(7) 0.0409(3) 0.098(3) Uani 1 1 d . . . 
H3 H 0.4154 0.1362 0.0744 0.118 Uiso 1 1 calc R . . 
C4 C 0.8433(7) -0.0803(7) 0.2031(3) 0.104(3) Uani 1 1 d . . . 
H4 H 0.8691 -0.0153 0.2007 0.125 Uiso 1 1 calc R . . 
C5 C 0.8355(7) 0.1593(8) 0.0984(3) 0.094(3) Uani 1 1 d . . . 
C6 C 0.9045(6) 0.0897(7) 0.1150(3) 0.099(3) Uani 1 1 d . . . 
H6 H 0.8997 0.0282 0.1034 0.118 Uiso 1 1 calc R . . 
C7 C 0.9806(8) 0.1130(11) 0.1493(4) 0.121(4) Uani 1 1 d . . . 
H7 H 1.0286 0.0672 0.1588 0.145 Uiso 1 1 calc R . . 
C8 C 0.9867(10) 0.1985(13) 0.1686(4) 0.135(5) Uani 1 1 d . . . 
H8 H 1.0363 0.2116 0.1923 0.162 Uiso 1 1 calc R . . 
C9 C 0.9193(11) 0.2665(11) 0.1533(5) 0.146(4) Uani 1 1 d . . . 
H9 H 0.9233 0.3266 0.1666 0.175 Uiso 1 1 calc R . . 
C10 C 0.8424(8) 0.2476(9) 0.1170(4) 0.118(3) Uani 1 1 d . . . 
H10 H 0.7976 0.2952 0.1064 0.141 Uiso 1 1 calc R . . 
C11 C 0.7998(7) 0.1318(8) 0.0121(3) 0.105(3) Uani 1 1 d . . . 
C12 C 0.8428(7) 0.0470(7) -0.0052(3) 0.098(3) Uani 1 1 d . . . 
H12 H 0.8399 -0.0082 0.0126 0.117 Uiso 1 1 calc R . . 
C13 C 0.8890(7) 0.0467(9) -0.0488(4) 0.112(3) Uani 1 1 d . . . 
H13 H 0.9194 -0.0083 -0.0601 0.134 Uiso 1 1 calc R . . 
C14 C 0.8899(9) 0.1267(12) -0.0749(3) 0.138(4) Uani 1 1 d . . . 
H14 H 0.9174 0.1252 -0.1051 0.166 Uiso 1 1 calc R . . 
C15 C 0.8507(10) 0.2111(11) -0.0577(4) 0.152(5) Uani 1 1 d . . . 
H15 H 0.8542 0.2657 -0.0759 0.183 Uiso 1 1 calc R . . 
C16 C 0.8079(8) 0.2143(8) -0.0152(3) 0.124(4) Uani 1 1 d . . . 
H16 H 0.7833 0.2715 -0.0036 0.149 Uiso 1 1 calc R . . 
C17 C 0.4674(10) -0.2084(7) 0.1290(3) 0.103(3) Uani 1 1 d . . . 
C18 C 0.3765(12) -0.2628(9) 0.1296(3) 0.132(4) Uani 1 1 d . . . 
H18 H 0.3132 -0.2343 0.1217 0.158 Uiso 1 1 calc R . . 
C19 C 0.3781(15) -0.3584(10) 0.1417(4) 0.161(5) Uani 1 1 d . . . 
H19 H 0.3178 -0.3941 0.1446 0.193 Uiso 1 1 calc R . . 
C20 C 0.477(2) -0.3956(13) 0.1490(5) 0.201(11) Uani 1 1 d . . . 
H20 H 0.4816 -0.4606 0.1539 0.241 Uiso 1 1 calc R . . 
C21 C 0.5714(18) -0.3455(12) 0.1498(5) 0.180(8) Uani 1 1 d . . . 
H21 H 0.6355 -0.3733 0.1569 0.215 Uiso 1 1 calc R . . 
C22 C 0.5595(10) -0.2501(8) 0.1390(3) 0.124(4) Uani 1 1 d . . . 
H22 H 0.6190 -0.2128 0.1385 0.149 Uiso 1 1 calc R . . 
C23 C 0.4080(7) -0.0515(5) 0.1574(3) 0.079(2) Uani 1 1 d . . . 
C24 C 0.4514(7) -0.0547(6) 0.2025(3) 0.094(3) Uani 1 1 d . . . 
H24 H 0.5107 -0.0913 0.2078 0.113 Uiso 1 1 calc R . . 
C25 C 0.4114(10) -0.0065(7) 0.2399(3) 0.119(4) Uani 1 1 d . . . 
H25 H 0.4423 -0.0110 0.2700 0.143 Uiso 1 1 calc R . . 
C26 C 0.3245(11) 0.0486(8) 0.2321(4) 0.123(4) Uani 1 1 d . . . 
H26 H 0.2962 0.0819 0.2571 0.147 Uiso 1 1 calc R . . 
C27 C 0.2795(8) 0.0548(7) 0.1878(5) 0.121(3) Uani 1 1 d . . . 
H27 H 0.2215 0.0930 0.1823 0.145 Uiso 1 1 calc R . . 
C28 C 0.3223(7) 0.0021(6) 0.1502(3) 0.102(3) Uani 1 1 d . . . 
H28 H 0.2907 0.0046 0.1202 0.123 Uiso 1 1 calc R . . 
C29 C 0.3072(8) 0.1750(6) 0.0239(3) 0.105(3) Uani 1 1 d . . . 
C30 C 0.2285(10) 0.1867(7) 0.0570(4) 0.125(4) Uani 1 1 d . . . 
H30 H 0.2439 0.1780 0.0891 0.151 Uiso 1 1 calc R . . 
C31 C 0.1257(10) 0.2117(8) 0.0420(5) 0.136(4) Uani 1 1 d . . . 
H31 H 0.0750 0.2212 0.0644 0.163 Uiso 1 1 calc R . . 
C32 C 0.1014(10) 0.2215(9) -0.0038(5) 0.149(5) Uani 1 1 d . . . 
H32 H 0.0341 0.2381 -0.0135 0.179 Uiso 1 1 calc R . . 
C33 C 0.1771(9) 0.2067(8) -0.0371(4) 0.134(4) Uani 1 1 d . . . 
H33 H 0.1593 0.2108 -0.0691 0.161 Uiso 1 1 calc R . . 
C34 C 0.2796(8) 0.1859(7) -0.0232(3) 0.111(3) Uani 1 1 d . . . 
H34 H 0.3298 0.1793 -0.0461 0.134 Uiso 1 1 calc R . . 
C35 C 0.4772(8) 0.2448(8) 0.0379(3) 0.103(4) Uani 1 1 d . . . 
C36 C 0.4781(10) 0.3137(10) 0.0731(4) 0.152(6) Uani 1 1 d . . . 
H36 H 0.4451 0.2998 0.1011 0.182 Uiso 1 1 calc R . . 
C37 C 0.5241(16) 0.4002(14) 0.0693(6) 0.198(10) Uani 1 1 d . . . 
H37 H 0.5179 0.4445 0.0934 0.238 Uiso 1 1 calc R . . 
C38 C 0.5798(12) 0.4221(10) 0.0296(7) 0.178(8) Uani 1 1 d . . . 
H38 H 0.6155 0.4791 0.0278 0.213 Uiso 1 1 calc R . . 
C39 C 0.5820(8) 0.3578(8) -0.0076(4) 0.125(4) Uani 1 1 d . . . 
H39 H 0.6156 0.3727 -0.0354 0.150 Uiso 1 1 calc R . . 
C40 C 0.5327(9) 0.2704(8) -0.0023(4) 0.122(4) Uani 1 1 d . . . 
H40 H 0.5369 0.2268 -0.0268 0.147 Uiso 1 1 calc R . . 
C41 C 0.8125(7) -0.0943(7) 0.2530(3) 0.089(3) Uani 1 1 d . . . 
C42 C 0.7322(8) -0.1595(8) 0.2628(4) 0.119(3) Uani 1 1 d . . . 
H42 H 0.6987 -0.1928 0.2384 0.142 Uiso 1 1 calc R . . 
C43 C 0.7043(8) -0.1730(8) 0.3103(5) 0.122(3) Uani 1 1 d . . . 
H43 H 0.6527 -0.2162 0.3177 0.146 Uiso 1 1 calc R . . 
C44 C 0.7545(10) -0.1209(9) 0.3457(4) 0.120(3) Uani 1 1 d . . . 
H44 H 0.7354 -0.1284 0.3771 0.144 Uiso 1 1 calc R . . 
C45 C 0.8306(9) -0.0598(8) 0.3350(4) 0.117(3) Uani 1 1 d . . . 
H45 H 0.8647 -0.0256 0.3590 0.140 Uiso 1 1 calc R . . 
C46 C 0.8572(7) -0.0483(7) 0.2898(3) 0.101(3) Uani 1 1 d . . . 
H46 H 0.9102 -0.0056 0.2835 0.121 Uiso 1 1 calc R . . 
C47 C 0.9336(9) -0.1442(9) 0.1949(3) 0.111(3) Uani 1 1 d . . . 
C48 C 0.9102(11) -0.2344(8) 0.1763(4) 0.127(4) Uani 1 1 d . . . 
H48 H 0.8430 -0.2519 0.1670 0.153 Uiso 1 1 calc R . . 
C49 C 0.9979(11) -0.2982(13) 0.1727(5) 0.166(7) Uani 1 1 d . . . 
H49 H 0.9853 -0.3587 0.1610 0.199 Uiso 1 1 calc R . . 
C50 C 1.0915(15) -0.2765(11) 0.1846(5) 0.155(6) Uani 1 1 d . . . 
H50 H 1.1440 -0.3206 0.1800 0.186 Uiso 1 1 calc R . . 
C51 C 1.1172(10) -0.1898(13) 0.2042(4) 0.160(6) Uani 1 1 d . . . 
H51 H 1.1855 -0.1761 0.2135 0.193 Uiso 1 1 calc R . . 
C52 C 1.0364(9) -0.1217(9) 0.2096(3) 0.132(4) Uani 1 1 d . . . 
H52 H 1.0514 -0.0628 0.2228 0.159 Uiso 1 1 calc R . . 
C53 C 0.6894(7) 0.1266(7) 0.2229(3) 0.106(3) Uani 1 1 d . . . 
H53A H 0.7636 0.1375 0.2208 0.127 Uiso 1 1 calc R . . 
H53B H 0.6779 0.0764 0.2455 0.127 Uiso 1 1 calc R . . 
C54 C 0.6357(11) 0.2134(8) 0.2368(4) 0.146(5) Uani 1 1 d . . . 
H54A H 0.5865 0.1989 0.2612 0.176 Uiso 1 1 calc R . . 
H54B H 0.6860 0.2582 0.2498 0.176 Uiso 1 1 calc R . . 
C55 C 0.5852(10) 0.2521(9) 0.1994(5) 0.160(5) Uani 1 1 d U . . 
H55A H 0.6243 0.3052 0.1874 0.192 Uiso 1 1 calc R . . 
H55B H 0.5172 0.2745 0.2085 0.192 Uiso 1 1 calc R . . 
C56 C 0.5740(7) 0.1762(7) 0.1622(3) 0.105(3) Uani 1 1 d . . . 
H56A H 0.5031 0.1528 0.1603 0.126 Uiso 1 1 calc R . . 
H56B H 0.5924 0.2004 0.1314 0.126 Uiso 1 1 calc R . . 
 
loop_ 
 _atom_site_aniso_label 
 _atom_site_aniso_U_11 
 _atom_site_aniso_U_22 
 _atom_site_aniso_U_33 
 _atom_site_aniso_U_23 
 _atom_site_aniso_U_13 
 _atom_site_aniso_U_12 
Mg1 0.112(2) 0.0993(19) 0.0348(12) -0.0138(12) -0.0163(13) 0.0591(16) 
Mg2 0.106(2) 0.113(2) 0.0397(13) -0.0069(13) -0.0144(13) 0.0531(17) 
O1 0.094(4) 0.115(4) 0.045(3) -0.008(3) -0.004(3) 0.045(3) 
O2 0.111(4) 0.090(4) 0.044(3) -0.009(3) -0.012(3) 0.046(3) 
O3 0.112(4) 0.095(4) 0.042(3) -0.018(2) -0.015(3) 0.064(3) 
O4 0.124(5) 0.151(5) 0.065(4) 0.016(3) -0.019(3) 0.065(4) 
O5 0.096(4) 0.117(4) 0.050(3) -0.018(3) -0.018(3) 0.043(3) 
C1 0.104(7) 0.143(9) 0.051(5) -0.006(5) -0.003(5) 0.071(6) 
C2 0.140(8) 0.083(6) 0.037(4) -0.006(4) -0.024(5) 0.030(6) 
C3 0.142(8) 0.103(7) 0.048(5) -0.021(5) -0.018(5) 0.084(7) 
C4 0.100(6) 0.141(8) 0.071(6) 0.028(5) -0.007(5) 0.045(6) 
C5 0.106(7) 0.132(8) 0.044(5) -0.008(5) -0.005(4) 0.045(6) 
C6 0.095(6) 0.152(8) 0.049(5) 0.016(5) -0.002(5) 0.043(6) 
C7 0.094(7) 0.201(13) 0.066(7) 0.015(7) -0.004(6) 0.031(8) 
C8 0.112(9) 0.227(16) 0.066(7) 0.002(9) -0.006(6) 0.015(10) 
C9 0.137(10) 0.190(13) 0.111(10) -0.047(9) -0.008(8) -0.015(10) 
C10 0.106(8) 0.143(9) 0.103(8) -0.012(7) 0.007(6) 0.035(7) 
C11 0.100(6) 0.163(9) 0.050(5) -0.009(6) -0.012(4) 0.071(6) 
C12 0.113(7) 0.119(7) 0.061(5) -0.018(5) -0.002(5) 0.027(6) 
C13 0.108(7) 0.163(10) 0.064(6) -0.033(7) 0.012(6) 0.016(7) 
C14 0.153(10) 0.218(14) 0.043(6) 0.009(8) -0.003(6) 0.025(10) 
C15 0.176(11) 0.216(14) 0.065(7) 0.028(8) 0.006(7) 0.100(10) 
C16 0.141(9) 0.169(10) 0.064(6) 0.023(6) -0.002(6) 0.088(7) 
C17 0.186(10) 0.088(7) 0.035(4) -0.012(4) -0.031(5) 0.049(8) 
C18 0.229(14) 0.084(8) 0.080(7) -0.009(6) -0.044(8) -0.002(8) 
C19 0.29(2) 0.101(11) 0.088(8) -0.012(7) -0.040(10) -0.010(11) 
C20 0.40(3) 0.120(14) 0.079(8) -0.032(9) -0.044(16) 0.115(18) 
C21 0.31(2) 0.131(15) 0.098(9) -0.003(9) -0.054(13) 0.085(13) 
C22 0.215(12) 0.100(8) 0.056(5) -0.005(5) -0.021(6) 0.067(8) 
C23 0.114(7) 0.067(5) 0.056(5) -0.006(4) -0.009(4) 0.013(5) 
C24 0.146(8) 0.086(6) 0.051(5) -0.015(4) -0.007(5) 0.027(5) 
C25 0.192(11) 0.104(8) 0.063(6) -0.021(5) 0.005(7) 0.028(8) 
C26 0.165(11) 0.123(9) 0.082(8) -0.034(7) 0.030(8) -0.008(8) 
C27 0.112(8) 0.105(8) 0.148(11) -0.036(8) 0.019(8) 0.010(6) 
C28 0.113(7) 0.098(7) 0.095(7) -0.032(6) -0.016(6) 0.012(6) 
C29 0.135(8) 0.120(7) 0.059(5) -0.021(5) -0.003(5) 0.078(6) 
C30 0.174(11) 0.119(8) 0.084(7) -0.006(6) 0.012(7) 0.066(8) 
C31 0.137(10) 0.134(9) 0.137(11) -0.012(8) 0.028(9) 0.062(8) 
C32 0.137(10) 0.179(12) 0.132(11) -0.014(9) 0.002(9) 0.105(9) 
C33 0.143(9) 0.151(9) 0.106(8) -0.008(7) -0.035(7) 0.082(8) 
C34 0.129(7) 0.138(8) 0.066(6) -0.016(5) -0.025(5) 0.082(6) 
C35 0.136(8) 0.111(8) 0.059(6) -0.041(6) -0.045(5) 0.088(7) 
C36 0.203(12) 0.161(11) 0.088(7) -0.065(8) -0.052(8) 0.112(10) 
C37 0.28(2) 0.140(14) 0.169(16) -0.095(14) -0.092(15) 0.089(15) 
C38 0.169(13) 0.116(10) 0.241(18) -0.071(14) -0.125(14) 0.087(10) 
C39 0.157(9) 0.082(7) 0.134(10) -0.025(7) -0.057(7) 0.050(7) 
C40 0.172(10) 0.100(8) 0.091(8) -0.046(6) -0.067(7) 0.077(7) 
C41 0.083(6) 0.111(7) 0.072(6) 0.039(5) 0.005(5) 0.013(5) 
C42 0.126(9) 0.126(9) 0.103(9) 0.020(7) -0.005(7) 0.016(7) 
C43 0.115(8) 0.128(9) 0.123(10) 0.026(8) 0.016(7) -0.025(7) 
C44 0.146(10) 0.122(9) 0.092(8) 0.023(7) 0.022(8) 0.021(8) 
C45 0.141(9) 0.116(8) 0.093(8) 0.024(6) -0.004(7) 0.001(7) 
C46 0.098(7) 0.138(8) 0.066(6) 0.029(6) -0.008(5) 0.001(6) 
C47 0.129(9) 0.139(10) 0.063(6) 0.007(6) -0.012(6) 0.039(8) 
C48 0.183(12) 0.105(8) 0.094(8) 0.002(6) -0.007(7) 0.022(8) 
C49 0.095(8) 0.243(18) 0.157(13) 0.030(11) -0.029(9) 0.029(10) 
C50 0.222(18) 0.141(11) 0.103(9) -0.008(8) 0.011(10) 0.105(12) 
C51 0.142(10) 0.240(17) 0.100(9) 0.037(10) 0.007(8) 0.106(12) 
C52 0.123(9) 0.199(12) 0.075(7) 0.011(7) -0.009(6) 0.033(9) 
C53 0.115(7) 0.143(8) 0.057(5) -0.031(5) -0.029(5) 0.041(6) 
C54 0.225(13) 0.122(8) 0.088(7) -0.043(6) -0.067(8) 0.048(9) 
C55 0.168(8) 0.164(8) 0.146(8) -0.053(7) -0.032(7) 0.039(7) 
C56 0.109(7) 0.127(7) 0.078(6) -0.034(5) -0.022(5) 0.047(6) 
 
_geom_special_details 
; 
 All esds (except the esd in the dihedral angle between two l.s. planes) 
 are estimated using the full covariance matrix.  The cell esds are taken 
 into account individually in the estimation of esds in distances, angles 
 and torsion angles; correlations between esds in cell parameters are only 
 used when they are defined by crystal symmetry.  An approximate (isotropic) 
 treatment of cell esds is used for estimating esds involving l.s. planes. 
; 
 
loop_ 
 _geom_bond_atom_site_label_1 
 _geom_bond_atom_site_label_2 
 _geom_bond_distance 
 _geom_bond_site_symmetry_2 
 _geom_bond_publ_flag 
Mg1 O1 1.939(6) . ? 
Mg1 O3 1.953(5) 3_655 ? 
Mg1 O3 1.964(5) . ? 
Mg1 O2 1.972(6) . ? 
Mg1 Mg1 2.930(4) 3_655 ? 
Mg2 O4 1.856(5) . ? 
Mg2 O1 1.954(6) . ? 
Mg2 O2 1.969(7) . ? 
Mg2 O5 2.022(5) . ? 
O1 C1 1.418(11) . ? 
O2 C2 1.407(10) . ? 
O3 C3 1.411(8) . ? 
O3 Mg1 1.953(5) 3_655 ? 
O4 C4 1.412(10) . ? 
O5 C56 1.429(9) . ? 
O5 C53 1.438(8) . ? 
C1 C11 1.530(11) . ? 
C1 C5 1.561(12) . ? 
C2 C23 1.517(11) . ? 
C2 C17 1.528(12) . ? 
C3 C35 1.494(14) . ? 
C3 C29 1.512(11) . ? 
C4 C41 1.486(11) . ? 
C4 C47 1.495(12) . ? 
C5 C10 1.357(13) . ? 
C5 C6 1.398(11) . ? 
C6 C7 1.395(13) . ? 
C7 C8 1.328(15) . ? 
C8 C9 1.356(16) . ? 
C9 C10 1.428(15) . ? 
C11 C16 1.404(13) . ? 
C11 C12 1.414(11) . ? 
C12 C13 1.382(11) . ? 
C13 C14 1.350(14) . ? 
C14 C15 1.389(15) . ? 
C15 C16 1.335(13) . ? 
C17 C22 1.344(13) . ? 
C17 C18 1.399(14) . ? 
C18 C19 1.393(16) . ? 
C19 C20 1.39(2) . ? 
C20 C21 1.40(2) . ? 
C21 C22 1.390(17) . ? 
C23 C28 1.348(10) . ? 
C23 C24 1.378(10) . ? 
C24 C25 1.369(11) . ? 
C25 C26 1.375(13) . ? 
C26 C27 1.367(14) . ? 
C27 C28 1.420(12) . ? 
C29 C34 1.376(11) . ? 
C29 C30 1.406(12) . ? 
C30 C31 1.421(14) . ? 
C31 C32 1.329(15) . ? 
C32 C33 1.386(14) . ? 
C33 C34 1.395(12) . ? 
C35 C36 1.391(13) . ? 
C35 C40 1.405(14) . ? 
C36 C37 1.36(2) . ? 
C37 C38 1.38(2) . ? 
C38 C39 1.389(16) . ? 
C39 C40 1.399(15) . ? 
C41 C46 1.342(12) . ? 
C41 C42 1.416(13) . ? 
C42 C43 1.411(14) . ? 
C43 C44 1.387(14) . ? 
C44 C45 1.347(13) . ? 
C45 C46 1.341(12) . ? 
C47 C48 1.408(14) . ? 
C47 C52 1.410(14) . ? 
C48 C49 1.449(15) . ? 
C49 C50 1.277(18) . ? 
C50 C51 1.381(18) . ? 
C51 C52 1.428(15) . ? 
C53 C54 1.466(12) . ? 
C54 C55 1.340(14) . ? 
C55 C56 1.506(13) . ? 
 
loop_ 
 _geom_angle_atom_site_label_1 
 _geom_angle_atom_site_label_2 
 _geom_angle_atom_site_label_3 
 _geom_angle 
 _geom_angle_site_symmetry_1 
 _geom_angle_site_symmetry_3 
 _geom_angle_publ_flag 
O1 Mg1 O3 138.7(2) . 3_655 ? 
O1 Mg1 O3 120.6(3) . . ? 
O3 Mg1 O3 83.2(2) 3_655 . ? 
O1 Mg1 O2 83.1(3) . . ? 
O3 Mg1 O2 118.5(3) 3_655 . ? 
O3 Mg1 O2 115.9(2) . . ? 
O1 Mg1 Mg1 147.4(3) . 3_655 ? 
O3 Mg1 Mg1 41.73(13) 3_655 3_655 ? 
O3 Mg1 Mg1 41.45(14) . 3_655 ? 
O2 Mg1 Mg1 127.7(3) . 3_655 ? 
O4 Mg2 O1 130.1(3) . . ? 
O4 Mg2 O2 117.2(3) . . ? 
O1 Mg2 O2 82.9(3) . . ? 
O4 Mg2 O5 107.5(2) . . ? 
O1 Mg2 O5 104.7(3) . . ? 
O2 Mg2 O5 112.4(2) . . ? 
C1 O1 Mg1 127.7(5) . . ? 
C1 O1 Mg2 128.8(5) . . ? 
Mg1 O1 Mg2 97.8(3) . . ? 
C2 O2 Mg2 137.9(4) . . ? 
C2 O2 Mg1 124.3(4) . . ? 
Mg2 O2 Mg1 96.2(3) . . ? 
C3 O3 Mg1 137.2(4) . 3_655 ? 
C3 O3 Mg1 124.9(4) . . ? 
Mg1 O3 Mg1 96.8(2) 3_655 . ? 
C4 O4 Mg2 135.4(6) . . ? 
C56 O5 C53 109.5(6) . . ? 
C56 O5 Mg2 121.3(4) . . ? 
C53 O5 Mg2 128.9(5) . . ? 
O1 C1 C11 114.5(8) . . ? 
O1 C1 C5 112.1(7) . . ? 
C11 C1 C5 107.7(7) . . ? 
O2 C2 C23 111.8(7) . . ? 
O2 C2 C17 114.4(8) . . ? 
C23 C2 C17 109.4(7) . . ? 
O3 C3 C35 114.1(8) . . ? 
O3 C3 C29 111.9(7) . . ? 
C35 C3 C29 107.1(7) . . ? 
O4 C4 C41 114.9(8) . . ? 
O4 C4 C47 113.7(8) . . ? 
C41 C4 C47 107.2(7) . . ? 
C10 C5 C6 118.9(9) . . ? 
C10 C5 C1 121.2(9) . . ? 
C6 C5 C1 119.9(9) . . ? 
C7 C6 C5 119.5(10) . . ? 
C8 C7 C6 122.2(12) . . ? 
C7 C8 C9 119.0(13) . . ? 
C8 C9 C10 121.3(13) . . ? 
C5 C10 C9 119.1(11) . . ? 
C16 C11 C12 118.6(8) . . ? 
C16 C11 C1 121.1(9) . . ? 
C12 C11 C1 120.2(9) . . ? 
C13 C12 C11 119.5(9) . . ? 
C14 C13 C12 119.7(10) . . ? 
C13 C14 C15 121.3(10) . . ? 
C16 C15 C14 120.5(12) . . ? 
C15 C16 C11 120.2(10) . . ? 
C22 C17 C18 119.1(10) . . ? 
C22 C17 C2 122.8(12) . . ? 
C18 C17 C2 118.1(10) . . ? 
C19 C18 C17 122.0(13) . . ? 
C20 C19 C18 114.3(17) . . ? 
C19 C20 C21 126.7(19) . . ? 
C22 C21 C20 113.4(18) . . ? 
C17 C22 C21 124.2(14) . . ? 
C28 C23 C24 117.8(8) . . ? 
C28 C23 C2 121.1(7) . . ? 
C24 C23 C2 121.1(8) . . ? 
C25 C24 C23 123.1(9) . . ? 
C24 C25 C26 118.6(10) . . ? 
C27 C26 C25 120.3(10) . . ? 
C26 C27 C28 119.2(10) . . ? 
C23 C28 C27 121.0(9) . . ? 
C34 C29 C30 117.3(9) . . ? 
C34 C29 C3 122.9(8) . . ? 
C30 C29 C3 119.8(8) . . ? 
C29 C30 C31 120.7(10) . . ? 
C32 C31 C30 120.5(11) . . ? 
C31 C32 C33 119.5(11) . . ? 
C32 C33 C34 121.2(10) . . ? 
C29 C34 C33 120.7(10) . . ? 
C36 C35 C40 113.7(13) . . ? 
C36 C35 C3 123.6(12) . . ? 
C40 C35 C3 122.7(8) . . ? 
C37 C36 C35 124.6(15) . . ? 
C36 C37 C38 120.0(15) . . ? 
C37 C38 C39 119.3(18) . . ? 
C38 C39 C40 118.6(14) . . ? 
C39 C40 C35 123.8(10) . . ? 
C46 C41 C42 117.6(9) . . ? 
C46 C41 C4 123.3(9) . . ? 
C42 C41 C4 119.1(10) . . ? 
C43 C42 C41 118.6(10) . . ? 
C44 C43 C42 119.3(10) . . ? 
C45 C44 C43 120.4(11) . . ? 
C46 C45 C44 119.8(11) . . ? 
C45 C46 C41 124.3(10) . . ? 
C48 C47 C52 120.2(11) . . ? 
C48 C47 C4 116.6(11) . . ? 
C52 C47 C4 122.8(11) . . ? 
C47 C48 C49 115.5(13) . . ? 
C50 C49 C48 124.1(16) . . ? 
C49 C50 C51 122.1(14) . . ? 
C50 C51 C52 118.3(14) . . ? 
C47 C52 C51 119.6(13) . . ? 
O5 C53 C54 104.6(7) . . ? 
C55 C54 C53 110.6(9) . . ? 
C54 C55 C56 107.1(10) . . ? 
O5 C56 C55 105.1(8) . . ? 
 
_diffrn_measured_fraction_theta_max    0.998 
_diffrn_reflns_theta_full              25.04 
_diffrn_measured_fraction_theta_full   0.998 
_refine_diff_density_max    1.532 
_refine_diff_density_min   -0.278 
_refine_diff_density_rms    0.131 
